# Supplementary material
Source: PubMed Central journal article supplement (PMC10364465)
Supplement: NIHMS1917192-supplement-ESM_2.pdf [file NIHMS1917192-supplement-ESM_2.pdf]

---

|                                               | <b>AUC</b> | <b>Accuracy</b> | <b>F1 Score</b> | <b>Precision</b> | <b>Recall</b> |
|-----------------------------------------------|------------|-----------------|-----------------|------------------|---------------|
| Univariate GBM                                | 0.79 (.02) | 0.70 (.03)      | 0.67 (.03)      | 0.70 (.03)       | 0.64 (.03)    |
| GBM with two-way interactions                 | 0.83 (.03) | 0.75 (.04)      | 0.73 (.05)      | 0.74 (.05)       | 0.72 (.05)    |
| Univariate Logistic regression                | 0.77 (.01) | 0.69 (.02)      | 0.66 (.02)      | 0.67 (.02)       | 0.65 (.01)    |
| Logistic regression with two-way interactions | 0.62 (.01) | 0.60 (.02)      | 0.54 (.03)      | 0.59 (.03)       | 0.50 (.04)    |

---

Footer: GBM=Gradient boosted multivariate regression, AUC=area under the curve.

**Article Title:** Cognitive phenotypes of HIV defined using a novel data-driven approach

**Journal Name:** Journal of Neuroimmune Pharmacology

**Author Names:** Robert H. Paul PhD, Kyu Cho MS, Andrew Belden PhD, Adam W. Carrico PhD, Eileen Martin PhD, Jacob Bolzenius PhD, Patrick Lockett PhD, Sarah A. Cooley PhD, Julie Mannarino BA, Jodi M. Gilman, PhD, Mariah Miano BA, and Beau M. Ances MD, PhD

**Affiliation and E-mail Address of the Corresponding Author:** University of Missouri – St. Louis, Missouri Institute of Mental Health; [paulro@umsl.edu](mailto:paulro@umsl.edu)
